# Supplementary material
Source: PubMed Central journal article supplement (PMC4892795)

# Map of playback sites in Soberania Park, Panama

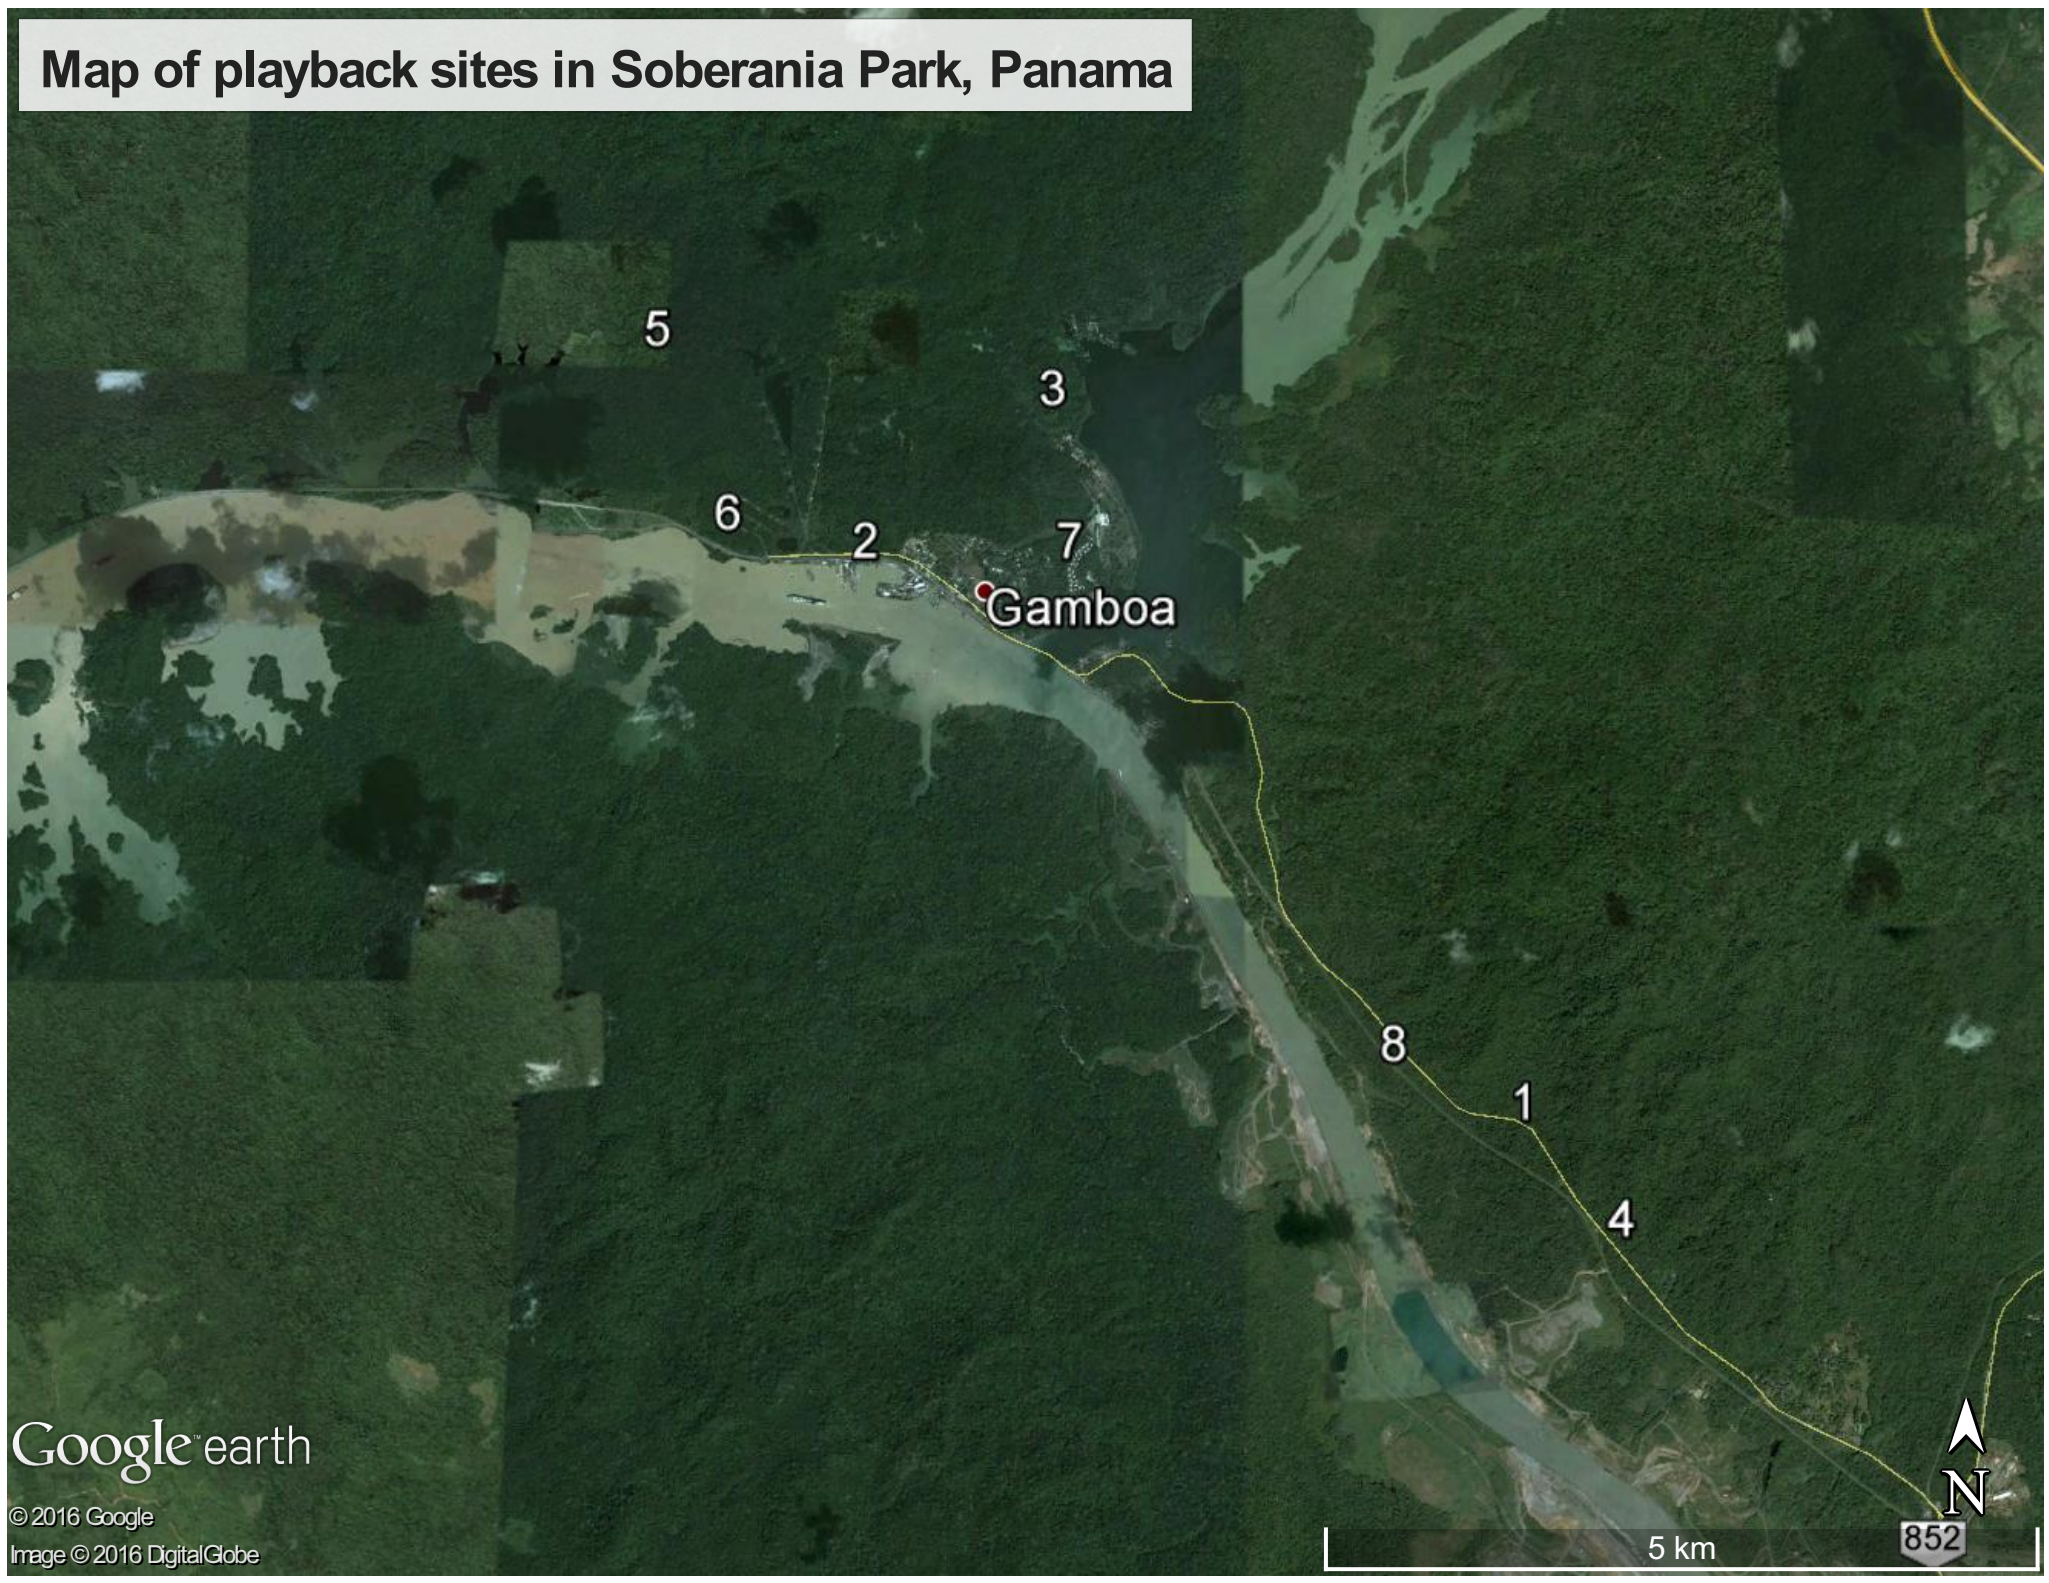

Google earth

© 2016 Google  
Image © 2016 DigitalGlobe

5 km

852

Supplement: rspb20160343supp1.pdf [file rspb20160343supp1.pdf]
